# Supplementary material
Source: PubMed Central journal article supplement (PMC9271592)
Supplement: NIHMS1805049-supplement-SFig1.pdf [file NIHMS1805049-supplement-SFig1.pdf]

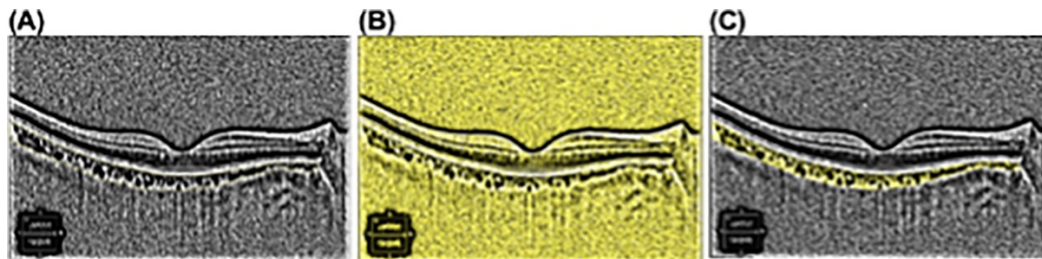

**Supplementary Figure 1:** Segmentation of a binarized OCT image using ImageJ (A) Binary image with polygon selection of total choroidal area (TCA), (B) Threshold color outlining the dark and light pixels, (C) Intersection of TCA polygon selection and color selection.
