# Supplementary material
Source: PubMed Central journal article supplement (PMC9271592)
Supplement: NIHMS1805049-supplement-SFig2.pdf [file NIHMS1805049-supplement-SFig2.pdf]

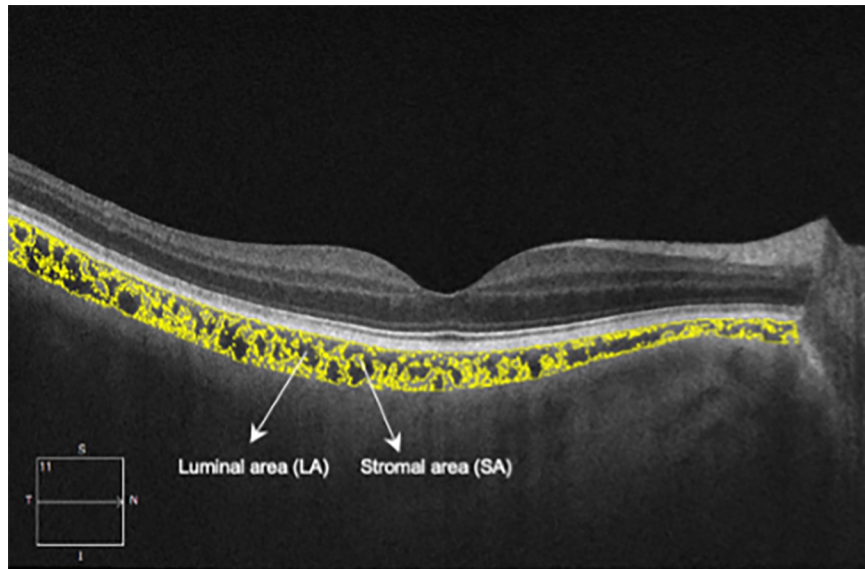

**Supplementary Figure 2:** Overlay of the region of interest with clear outline of the total choroidal area, luminal area, and stromal area on an HD 21-line OCT image.
