# Supplementary material
Source: PubMed Central journal article supplement (PMC9271592)
Supplement: NIHMS1805049-supplement-SFig3.pdf [file NIHMS1805049-supplement-SFig3.pdf]

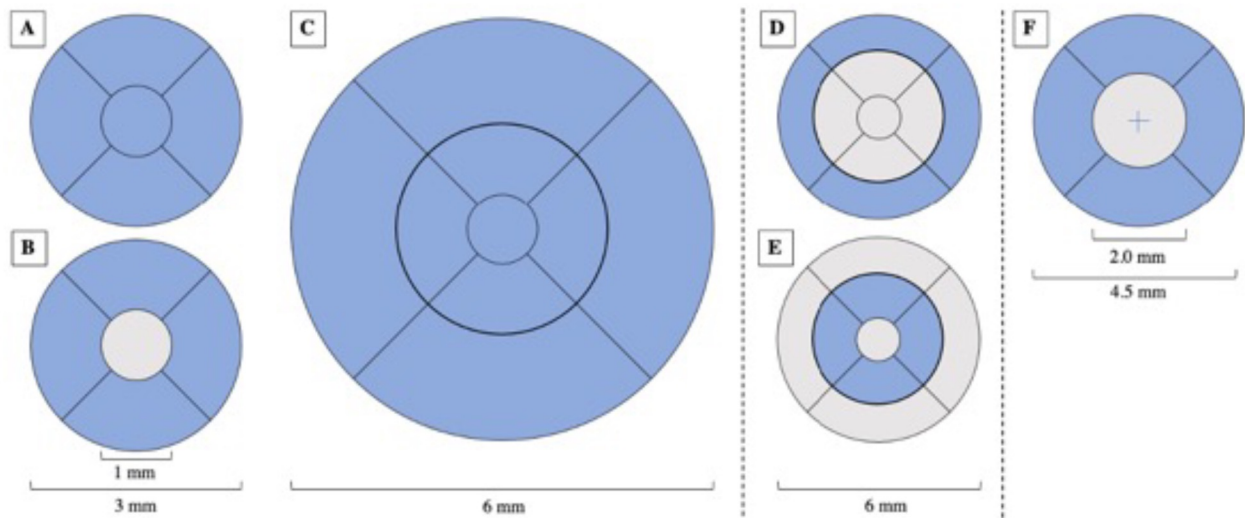

**Supplementary Figure 3:** Early Treatment Diabetic Retinopathy Study (ETDRS) subfields for measurement of macula-centered OCT angiography vessel density and perfusion density averaged over the highlighted areas. (A) 3mm circle, (B) 3mm ring, (C) 6mm circle, (D) 6mm outer ring, (E) 6mm inner ring. Peripapillary OCT angiography measurement sectors (F) with crosshairs denoting the optic disc center.
