# Supplementary material
Source: PubMed Central journal article supplement (PMC9271592)
Supplement: NIHMS1805049-supplement-SFig4.pdf [file NIHMS1805049-supplement-SFig4.pdf]

**Supplementary Table 4: Retinal and choroidal imaging parameters of subjects imaged longitudinally**

| Parameters                                      | Baseline <sup>a</sup>                                                     |                                                                              |                      | 2-year follow-up                                                          |                                                                              |                      |
|-------------------------------------------------|---------------------------------------------------------------------------|------------------------------------------------------------------------------|----------------------|---------------------------------------------------------------------------|------------------------------------------------------------------------------|----------------------|
|                                                 | APOE $\epsilon$ 4+ and Family history of dementia N=90 eyes (48 subjects) | APOE $\epsilon$ 4- and no family history of dementia N=64 eyes (33 subjects) | P-value <sup>b</sup> | APOE $\epsilon$ 4+ and Family history of dementia N=90 eyes (48 subjects) | APOE $\epsilon$ 4- and no family history of dementia N=64 eyes (33 subjects) | P-value <sup>b</sup> |
| <b>OCT parameters, mean (SD)</b>                |                                                                           |                                                                              |                      |                                                                           |                                                                              |                      |
| CST, microns                                    | 263.9<br>(22.93)                                                          | 266.6<br>(19.44)                                                             | 0.077                | 263.5<br>(23.43)                                                          | 264.7<br>(19.08)                                                             | 0.660                |
| Average GC-IPL thickness, microns               | 76.49<br>(8.43)                                                           | 75.94<br>(7.56)                                                              | 0.602                | 76.24<br>(9.36)                                                           | 76.45<br>(6.92)                                                              | 0.308                |
| Average RNFL thickness, microns                 | 89.52<br>(10.39)                                                          | 88.03<br>(9.43)                                                              | 0.791                | 89.91<br>(10.28)                                                          | 89.10<br>(9.83)                                                              | 0.775                |
| <b>Choroidal parameters, mean (SD)</b>          |                                                                           |                                                                              |                      |                                                                           |                                                                              |                      |
| Total choroidal area, units <sup>2c</sup>       | 4.95<br>(0.81)                                                            | 4.64<br>(1.02)                                                               | 0.416                | 5.04<br>(0.96)                                                            | 4.59<br>(0.98)                                                               | 0.295                |
| Luminal area, units <sup>2c</sup>               | 3.38<br>(0.54)                                                            | 3.16<br>(0.67)                                                               | 0.389                | 3.42<br>(0.62)                                                            | 3.13<br>(0.64)                                                               | 0.287                |
| Choroidal vascularity index, %                  | 0.68<br>(0.02)                                                            | 0.68<br>(0.02)                                                               | 0.984                | 0.68<br>(0.02)                                                            | 0.68<br>(0.02)                                                               | 0.780                |
| <b>OCTA parameters, mean (SD)</b>               |                                                                           |                                                                              |                      |                                                                           |                                                                              |                      |
| FAZ area, mm <sup>2</sup>                       | 0.24<br>(0.08)                                                            | 0.24<br>(0.09)                                                               | 0.748                | 0.24<br>(0.08)                                                            | 0.24<br>(0.09)                                                               | 0.198                |
| PD (3mm ETDRS circle)                           | 0.36<br>(0.03)                                                            | 0.36<br>(0.02)                                                               | 0.562                | 0.36<br>(0.03)                                                            | 0.36<br>(0.03)                                                               | 0.368                |
| PD (3mm ETDRS ring)                             | 0.38<br>(0.03)                                                            | 0.38<br>(0.03)                                                               | 0.398                | 0.38<br>(0.03)                                                            | 0.38<br>(0.03)                                                               | 0.248                |
| VD (3mm ETDRS circle), mm <sup>-1</sup>         | 20.05<br>(1.78)                                                           | 19.85<br>(1.51)                                                              | 0.616                | 20.01<br>(1.62)                                                           | 19.87<br>(1.52)                                                              | 0.554                |
| VD (3mm ETDRS ring), mm <sup>-1</sup>           | 21.10<br>(1.79)                                                           | 20.92<br>(1.54)                                                              | 0.446                | 21.07<br>(1.66)                                                           | 20.94<br>(1.54)                                                              | 0.440                |
| PD (6mm ETDRS circle)                           | 0.44<br>(0.03)                                                            | 0.44<br>(0.03)                                                               | 0.921                | 0.44<br>(0.03)                                                            | 0.44<br>(0.03)                                                               | 0.316                |
| PD (6mm ETDRS outer ring)                       | 0.45<br>(0.03)                                                            | 0.44<br>(0.03)                                                               | 0.878                | 0.44<br>(0.04)                                                            | 0.44<br>(0.04)                                                               | 0.200                |
| PD (6mm ETDRS inner ring)                       | 0.43<br>(0.03)                                                            | 0.43<br>(0.03)                                                               | 0.555                | 0.43<br>(0.03)                                                            | 0.43<br>(0.04)                                                               | 0.608                |
| VD (6mm ETDRS circle), mm <sup>-1</sup>         | 18.02<br>(1.19)                                                           | 17.78<br>(1.15)                                                              | 0.815                | 17.75<br>(1.28)                                                           | 17.66<br>(1.28)                                                              | 0.387                |
| VD (6mm ETDRS outer ring), mm <sup>-1</sup>     | 18.27<br>(1.19)                                                           | 17.99<br>(1.21)                                                              | 0.703                | 17.96<br>(1.37)                                                           | 17.87<br>(1.32)                                                              | 0.261                |
| VD (6mm ETDRS inner ring), mm <sup>-1</sup>     | 18.11<br>(1.30)                                                           | 18.04<br>(1.28)                                                              | 0.638                | 17.95<br>(1.31)                                                           | 17.91<br>(1.41)                                                              | 0.616                |
| <b>Peripapillary OCTA parameters, mean (SD)</b> |                                                                           |                                                                              |                      |                                                                           |                                                                              |                      |

|                   |                 |                 |       |                 |                 |              |
|-------------------|-----------------|-----------------|-------|-----------------|-----------------|--------------|
| CPD (average), %  | 44.02<br>(1.87) | 43.77<br>(1.46) | 0.706 | 44.39<br>(1.99) | 43.89<br>(1.43) | 0.893        |
| CPD (superior), % | 42.33<br>(3.01) | 42.71<br>(2.18) | 0.191 | 42.35<br>(2.76) | 42.67<br>(1.96) | <b>0.036</b> |
| CPD (nasal), %    | 42.73<br>(2.65) | 43.10<br>(2.41) | 0.403 | 43.58<br>(2.41) | 43.13<br>(1.95) | 0.841        |
| CPD (inferior), % | 45.01<br>(3.05) | 44.36<br>(2.60) | 0.834 | 44.56<br>(2.84) | 43.95<br>(2.40) | 0.743        |
| CPD (temporal), % | 46.03<br>(2.13) | 44.88<br>(2.73) | 0.168 | 46.99<br>(2.33) | 45.67<br>(2.35) | 0.079        |
| CFI (average)     | 0.41<br>(0.04)  | 0.41<br>(0.04)  | 0.976 | 0.44<br>(0.03)  | 0.43<br>(0.03)  | 0.142        |
| CFI (superior)    | 0.41<br>(0.04)  | 0.41<br>(0.03)  | 0.611 | 0.42<br>(0.03)  | 0.42<br>(0.03)  | 0.089        |
| CFI (nasal)       | 0.40<br>(0.06)  | 0.40<br>(0.05)  | 0.687 | 0.44<br>(0.04)  | 0.43<br>(0.03)  | 0.246        |
| CFI (inferior)    | 0.42<br>(0.03)  | 0.42<br>(0.03)  | 0.909 | 0.43<br>(0.03)  | 0.42<br>(0.02)  | 0.320        |
| CFI (temporal)    | 0.41<br>(0.06)  | 0.42<br>(0.06)  | 0.933 | 0.46<br>(0.04)  | 0.45<br>(0.03)  | 0.058        |

CST=central subfield thickness, GC-IPL=ganglion cell-inner plexiform layer, RNFL=retinal nerve fiber layer, FAZ=foveal avascular zone, PD=perfusion density, VD=vessel density, ETDRS=Early Treatment Diabetic Retinopathy Study, CPD=capillary perfusion density, CFI=capillary flux index.

<sup>a</sup>Note: baseline data only those for subjects were participated in 2-year follow-up imaging

<sup>b</sup>P-values based on generalized estimating equations (GEE) model score statistic for testing differences among and between means. P-values from GEE model adjusted for sex and age.

<sup>c</sup>Units<sup>2</sup>= 96×96 pixels<sup>2</sup>
