# Supplementary material
Source: PubMed Central journal article supplement (PMC9271592)
Supplement: NIHMS1805049-supplement-SFig5.pdf [file NIHMS1805049-supplement-SFig5.pdf]

**Supplementary Table 5: Rate of change in retinal and choroidal imaging parameters**

|                                                 | APOE ε4+ and Family history of dementia<br>N=90 eyes (48 subjects) |                          | APOE ε4- and no family history of dementia<br>N=64 eyes (33 subjects) |                          | P-value <sup>a</sup> |
|-------------------------------------------------|--------------------------------------------------------------------|--------------------------|-----------------------------------------------------------------------|--------------------------|----------------------|
|                                                 | Mean change per year (SD)                                          | Equivalent % change/year | Mean change per year (SD)                                             | Equivalent % change/year |                      |
| <b>OCT parameters</b>                           |                                                                    |                          |                                                                       |                          |                      |
| CST, microns                                    | -0.357 (3.488)                                                     | -0.14%                   | -0.906 (2.956)                                                        | -0.34%                   | 0.791                |
| Average GC-IPL thickness, microns               | -0.157 (1.321)                                                     | -0.21%                   | 0.277 (1.312)                                                         | 0.36%                    | <b>0.038</b>         |
| Average RNFL thickness, microns                 | 0.170 (1.471)                                                      | 0.19%                    | 0.552 (1.959)                                                         | 0.63%                    | 0.074                |
| <b>Choroidal parameters</b>                     |                                                                    |                          |                                                                       |                          |                      |
| Total choroidal area, units <sup>2 b</sup>      | 0.021 (0.280)                                                      | 0.42%                    | -0.036 (0.202)                                                        | -0.78%                   | 0.746                |
| Luminal area, units <sup>2 b</sup>              | 0.011 (0.182)                                                      | 0.33%                    | -0.023 (0.127)                                                        | -0.73%                   | 0.806                |
| Choroidal vascularity index, %                  | < -0.0005 (0.006)                                                  | < -0.07%                 | 0.001 (0.007)                                                         | 0.15%                    | 0.589                |
| <b>OCTA parameters</b>                          |                                                                    |                          |                                                                       |                          |                      |
| FAZ area, mm <sup>2</sup>                       | 0.001 (0.012)                                                      | 0.42%                    | 0.001 (0.021)                                                         | 0.42%                    | 0.690                |
| PD (3mm ETDRS circle)                           | 0.003 (0.017)                                                      | 0.83%                    | 0.003 (0.016)                                                         | 0.83%                    | 0.792                |
| PD (3mm ETDRS ring)                             | 0.003 (0.017)                                                      | 0.79%                    | 0.003 (0.017)                                                         | 0.79%                    | 0.796                |
| VD (3mm ETDRS circle), mm <sup>-1</sup>         | 0.063 (0.988)                                                      | 0.31%                    | 0.067 (0.930)                                                         | 0.34%                    | 0.785                |
| VD (3mm ETDRS ring), mm <sup>-1</sup>           | 0.023 (0.939)                                                      | 0.11%                    | 0.014 (0.903)                                                         | 0.07%                    | 0.653                |
| PD (6mm ETDRS circle)                           | -0.001 (0.017)                                                     | -0.23%                   | -0.001 (0.017)                                                        | -0.23%                   | 0.602                |
| PD (6mm ETDRS outer ring)                       | -0.002 (0.016)                                                     | -0.44%                   | 0.001 (0.020)                                                         | 0.23%                    | 0.641                |
| PD (6mm ETDRS inner ring)                       | 0.001 (0.024)                                                      | 0.23%                    | 0.001 (0.020)                                                         | 0.23%                    | 0.257                |
| VD (6mm ETDRS circle), mm <sup>-1</sup>         | -0.100 (0.633)                                                     | -0.55%                   | -0.014 (0.730)                                                        | -0.08%                   | 0.474                |
| VD (6mm ETDRS outer ring), mm <sup>-1</sup>     | -0.131 (0.583)                                                     | -0.72%                   | -0.009 (0.757)                                                        | -0.05%                   | 0.691                |
| VD (6mm ETDRS inner ring), mm <sup>-1</sup>     | -0.018 (0.917)                                                     | -0.10%                   | -0.025 (0.772)                                                        | -0.14%                   | 0.218                |
| <b>Peripapillary OCTA parameters, mean (SD)</b> |                                                                    |                          |                                                                       |                          |                      |
| CPD (average), %                                | -0.149 (0.708)                                                     | -0.34%                   | -0.070 (0.664)                                                        | -0.16%                   | 0.786                |
| CPD (superior), %                               | 0.044 (1.094)                                                      | 0.10%                    | 0.002 (0.845)                                                         | 0.00%                    | 0.135                |
| CPD (nasal), %                                  | -0.398 (1.044)                                                     | -0.92%                   | -0.039 (1.021)                                                        | -0.09%                   | 0.443                |
| CPD (inferior), %                               | 0.235 (0.891)                                                      | 0.53%                    | 0.206 (0.746)                                                         | 0.46%                    | 0.774                |

|                   |                |        |                |        |       |
|-------------------|----------------|--------|----------------|--------|-------|
| CPD (temporal), % | -0.438 (0.801) | -0.98% | -0.412 (1.166) | -0.88% | 0.942 |
| CFI (average)     | -0.013 (0.021) | -3.17% | -0.011 (0.020) | -2.50% | 0.411 |
| CFI (superior)    | -0.006 (0.017) | -1.46% | -0.005 (0.014) | -1.19% | 0.401 |
| CFI (nasal)       | -0.016 (0.028) | -4.00% | -0.015 (0.027) | -3.41% | 0.341 |
| CFI (inferior)    | -0.005 (0.014) | -1.19% | -0.003 (0.013) | -0.70% | 0.594 |
| CFI (temporal)    | -0.022 (0.029) | -5.24% | -0.019 (0.033) | -4.13% | 0.458 |

CST=central subfield thickness, GC-IPL=ganglion cell-inner plexiform layer, RNFL=retinal nerve fiber layer, FAZ=foveal avascular zone, PD=perfusion density, VD=vessel density, ETDRS=Early Treatment Diabetic Retinopathy Study, CPD=capillary perfusion density, CFI=capillary flux index.

<sup>a</sup>P-values based on generalized estimating equations (GEE) model score statistic for testing differences among and between means. P-values from GEE model adjusted for sex and age.

<sup>b</sup>Units<sup>2</sup>= 96×96 pixels<sup>2</sup>
