# Supplementary material
Source: PubMed Central journal article supplement (PMC9271592)
Supplement: NIHMS1805049-supplement-ST1.pdf [file NIHMS1805049-supplement-ST1.pdf]

**Supplementary Table 1: Demographic characteristics of all subjects at baseline**

|                               | APOE ε4+ and Family history of dementia<br>N=67 subjects<br>(129 eyes) | APOE ε4- and no family history of dementia<br>N=56 subjects<br>(106 eyes) | P-value <sup>a</sup> |
|-------------------------------|------------------------------------------------------------------------|---------------------------------------------------------------------------|----------------------|
| Age, mean (SD)                | 69.5 (6.7)                                                             | 72.9 (6.4)                                                                | 0.007                |
| Years of education, mean (SD) | 16.9 (1.9)                                                             | 16.8 (2.0)                                                                | 0.698                |
| Female Sex (%)                | 54 (81)                                                                | 39 (70)                                                                   | 0.206                |
| Race, N (%)                   |                                                                        |                                                                           |                      |
| White                         | 62 (93)                                                                | 50 (89)                                                                   | 0.510                |
| Black                         | 4 (6)                                                                  | 6 (11)                                                                    |                      |
| Asian                         | 1 (1)                                                                  | 0                                                                         |                      |
| Other/Not reported            | 0                                                                      | 0                                                                         |                      |
| MMSE score, mean (SD)         | 29.4 (1.1)                                                             | 29.3 (0.9)                                                                | 0.557                |

MMSE=Mini-Mental State Examination

<sup>a</sup>P-value for continuous variables based on Wilcoxon rank sum test of difference between medians. P-value for categorical variables based on Fisher's exact test of difference between proportions.
