# Supplementary material
Source: PubMed Central journal article supplement (PMC9271592)
Supplement: NIHMS1805049-supplement-ST2.pdf [file NIHMS1805049-supplement-ST2.pdf]

**Supplementary Table 2: Retinal and choroidal imaging parameters of all subjects at baseline**

| Parameters                                      | APOE ε4+ and Family history of dementia<br>N= 129 eyes (67 subjects) | APOE ε4- and no family history of dementia<br>N= 106 eyes (56 subjects) | P-value <sup>a</sup> |
|-------------------------------------------------|----------------------------------------------------------------------|-------------------------------------------------------------------------|----------------------|
| <b>OCT parameters, mean (SD)</b>                |                                                                      |                                                                         |                      |
| CST, microns                                    | 265.1 (21.91)                                                        | 265.3 (22.71)                                                           | 0.799                |
| Average GC-IPL thickness, microns               | 75.97 (7.64)                                                         | 75.08 (7.47)                                                            | 0.894                |
| Average RNFL thickness, microns                 | 88.29 (9.96)                                                         | 87.95 (9.89)                                                            | 0.741                |
| <b>Choroidal parameters, mean (SD)</b>          |                                                                      |                                                                         |                      |
| Total choroidal area, units <sup>2b</sup>       | 4.76 (0.99)                                                          | 4.65 (1.06)                                                             | 0.498                |
| Luminal area, units <sup>2b</sup>               | 3.24 (0.66)                                                          | 3.16 (0.71)                                                             | 0.484                |
| Choroidal vascularity index, %                  | 0.68 (0.02)                                                          | 0.68 (0.02)                                                             | 0.905                |
| <b>OCTA parameters, mean (SD)</b>               |                                                                      |                                                                         |                      |
| FAZ area, mm <sup>2</sup>                       | 0.25 (0.09)                                                          | 0.25 (0.11)                                                             | 0.724                |
| PD (3mm ETDRS circle)                           | 0.36 (0.03)                                                          | 0.35 (0.03)                                                             | 0.869                |
| PD (3mm ETDRS ring)                             | 0.38 (0.03)                                                          | 0.37 (0.03)                                                             | 0.909                |
| VD (3mm ETDRS circle), mm <sup>-1</sup>         | 20.05 (1.67)                                                         | 19.67 (1.52)                                                            | 0.806                |
| VD (3mm ETDRS ring), mm <sup>-1</sup>           | 21.12 (1.69)                                                         | 20.73 (1.54)                                                            | 0.851                |
| PD (6mm ETDRS circle)                           | 0.44 (0.03)                                                          | 0.43 (0.03)                                                             | 0.673                |
| PD (6mm ETDRS outer ring)                       | 0.45 (0.03)                                                          | 0.44 (0.04)                                                             | 0.833                |
| PD (6mm ETDRS inner ring)                       | 0.43 (0.03)                                                          | 0.43 (0.03)                                                             | 0.419                |
| VD (6mm ETDRS circle), mm <sup>-1</sup>         | 17.90 (1.24)                                                         | 17.73 (1.29)                                                            | 0.845                |
| VD (6mm ETDRS outer ring), mm <sup>-1</sup>     | 18.15 (1.27)                                                         | 17.93 (1.45)                                                            | 0.932                |
| VD (6mm ETDRS inner ring), mm <sup>-1</sup>     | 18.05 (1.27)                                                         | 18.00 (1.16)                                                            | 0.494                |
| <b>Peripapillary OCTA parameters, mean (SD)</b> |                                                                      |                                                                         |                      |
| CPD (average), %                                | 43.86 (1.84)                                                         | 43.41 (2.01)                                                            | 0.620                |
| CPD (superior), %                               | 42.28 (2.84)                                                         | 42.31 (2.64)                                                            | 0.392                |
| CPD (nasal), %                                  | 42.36 (2.73)                                                         | 42.64 (2.41)                                                            | 0.246                |
| CPD (inferior), %                               | 44.64 (2.94)                                                         | 43.87 (3.01)                                                            | 0.865                |
| CPD (temporal), %                               | 46.20 (2.72)                                                         | 45.23 (3.01)                                                            | 0.149                |
| CFI (average)                                   | 0.40 (0.04)                                                          | 0.41 (0.04)                                                             | 0.612                |
| CFI (superior)                                  | 0.40 (0.04)                                                          | 0.41 (0.04)                                                             | 0.425                |
| CFI (nasal)                                     | 0.39 (0.06)                                                          | 0.39 (0.06)                                                             | 0.720                |
| CFI (inferior)                                  | 0.41 (0.03)                                                          | 0.41 (0.03)                                                             | 0.651                |
| CFI (temporal)                                  | 0.40 (0.06)                                                          | 0.41 (0.06)                                                             | 0.606                |

CST=central subfield thickness, GC-IPL=ganglion cell-inner plexiform layer, RNFL=retinal nerve fiber layer, FAZ=foveal avascular zone, PD=perfusion density, VD=vessel density, ETDRS=Early Treatment Diabetic Retinopathy Study, CPD=capillary perfusion density, CFI=capillary flux index.

<sup>a</sup>P-values based on generalized estimating equations (GEE) model score statistic for testing differences among and between means. P-values from GEE model adjusted for sex and age.

<sup>b</sup>Units<sup>2</sup>= 96×96 pixels<sup>2</sup>
