# Supplementary material
Source: PubMed Central journal article supplement (PMC9271592)
Supplement: NIHMS1805049-supplement-ST3.pdf [file NIHMS1805049-supplement-ST3.pdf]

**Supplementary Table 3: Demographic characteristics of subjects imaged longitudinally**

|                                    | APOE ε4+ and Family history of dementia<br>N=48 subjects (90 eyes) | APOE ε4- and no family history of dementia<br>N=33 subjects (64 eyes) | P-value <sup>a</sup> |
|------------------------------------|--------------------------------------------------------------------|-----------------------------------------------------------------------|----------------------|
| Age at baseline, mean (SD)         | 68.4 (6.6)                                                         | 72.3 (6.5)                                                            | 0.016                |
| Years of education, mean (SD)      | 17.0 (1.9)                                                         | 16.8 (2.1)                                                            | 0.696                |
| Female sex, N (%)                  | 40 (83)                                                            | 21 (64)                                                               | 0.066                |
| Race, N (%)                        |                                                                    |                                                                       |                      |
| White                              | 45 (94)                                                            | 32 (97)                                                               | 0.999                |
| Black                              | 2 (4)                                                              | 1 (3)                                                                 |                      |
| Asian                              | 1 (2)                                                              | 0                                                                     |                      |
| Other/Not reported                 | 0                                                                  | 0                                                                     |                      |
| MMSE score at baseline, mean (SD)  | 29.5 (0.9)                                                         | 29.4 (0.8)                                                            | 0.298                |
| MMSE score at follow-up, mean (SD) | 29.8 (0.5)                                                         | 29.7 (0.7)                                                            | 0.662                |

MMSE=Mini-Mental State Examination

<sup>a</sup>P-value for continuous variables based on Wilcoxon rank sum test of difference between medians. P-value for categorical variables based on Fisher's exact test of difference between proportions.
